# Supplementary material for: Deep Convolutional Neural Networks Outperform Feature-Based But Not Categorical Models in Explaining Object Similarity Judgments
Source: PubMed Central journal article supplement (PMC5640771; doi:10.3389/fpsyg.2017.01726), 2017-10-09
Supplement: Table_1.pdf [file Table_1.pdf]

Supplementary Table 1. List of predictors for the conceptual models.

|    | all features | parts          | colour             | contour          | texture                      | all categories  | subordinate categories | basic categories                  | superordinate categories |
|----|--------------|----------------|--------------------|------------------|------------------------------|-----------------|------------------------|-----------------------------------|--------------------------|
| 1  | arched       | arm            | black              | arched           | brick                        | animal          | armadillo              | animal                            | artificial               |
| 2  | arm          | back           | blonde             | arrow            | furry                        | armadillo       | aubergine              | body part                         | natural                  |
| 3  | arrow        | beard          | blue               | coiled           | glass                        | artificial      | baboon                 | building                          | food/edible              |
| 4  | back         | branches       | brown              | curved           | hairy                        | aubergine       | banana                 | carnivore                         | organism/living          |
| 5  | beard        | brick          | green              | cylindrical      | leafy                        | baboon          | bottle                 | cold-blooded                      | nonliving/manmade        |
| 6  | black        | bristles       | grey               | domed            | long                         | banana          | building               | entrance                          |                          |
| 7  | blonde       | building       | red                | pear-shaped      | metallic                     | body part       | camel                  | face                              |                          |
| 8  | blue         | cheeks         | white              | rectangular      | plastic                      | bottle          | carrots                | fruit                             |                          |
| 9  | branches     | chest          | wooden             | rounded          | shiny                        | building        | chimpanzee             | gesture                           |                          |
| 10 | brick        | collar         | woolly             | spiky            | spiky                        | camel           | courgette              | hand                              |                          |
| 11 | bristles     | core           | yellow             | straight         | stubbly                      | carnivore       | crocodile              | herbivore                         |                          |
| 12 | brown        | dimples        | socks/pink         | symmetrical      | sharp/scaly                  | carrots         | dancer                 | home                              |                          |
| 13 | building     | dress          | wet/water          | cloves/bulbous   | spire/ steeple/tall          | chimpanzee      | door                   | horned                            |                          |
| 14 | cheeks       | ear            | purple/seat/wheels | round/circular   | beak/feathers/feathery/wings | cold-blooded    | elephant               | landscape                         |                          |
| 15 | chest        | eye            |                    | cubic/hob/square |                              | courgette       | fist                   | limb                              |                          |
| 16 | coiled       | eyelashes      |                    |                  |                              | crocodile       | garlic                 | livestock                         |                          |
| 17 | collar       | feet           |                    |                  |                              | dancer          | giraffe                | male                              |                          |
| 18 | core         | fur            |                    |                  |                              | door            | goat                   | mammal                            |                          |
| 19 | curved       | glasses        |                    |                  |                              | elephant        | grapes                 | man                               |                          |
| 20 | cylindrical  | goatee         |                    |                  |                              | entrance        | great dane             | monkey                            |                          |
| 21 | dimples      | hair           |                    |                  |                              | face            | hammer                 | object                            |                          |
| 22 | domed        | handle         |                    |                  |                              | fist            | hand                   | primate                           |                          |
| 23 | dress        | head           |                    |                  |                              | fruit           | key                    | reptile                           |                          |
| 24 | ear          | hooves         |                    |                  |                              | garlic          | kiwi                   | road                              |                          |
| 25 | eye          | horns          |                    |                  |                              | gesture         | lettuce                | salad                             |                          |
| 26 | eyelashes    | humps          |                    |                  |                              | giraffe         | man                    | sense                             |                          |
| 27 | feet         | knuckles       |                    |                  |                              | goat            | monkey                 | shelter                           |                          |
| 28 | flesh        | leaves         |                    |                  |                              | grapes          | pear                   | symbol                            |                          |
| 29 | fur          | lips           |                    |                  |                              | great dane      | pepper                 | technology                        |                          |
| 30 | furry        | moustache      |                    |                  |                              | hammer          | pinecone               | tree                              |                          |
| 31 | glass        | nail           |                    |                  |                              | hand            | pineapple              | urban                             |                          |
| 32 | glasses      | neck           |                    |                  |                              | herbivore       | radish                 | vegetable                         |                          |
| 33 | goatee       | necklace       |                    |                  |                              | home            | red pepper             | vertebrate                        |                          |
| 34 | green        | nostrils       |                    |                  |                              | horned          | roundabout sign        | warning                           |                          |
| 35 | grey         | overalls       |                    |                  |                              | key             | sheep                  | frog/amphibian                    |                          |
| 36 | hair         | palm           |                    |                  |                              | kiwi            | snake                  | structure/architecture            |                          |
| 37 | hairy        | plants         |                    |                  |                              | landscape       | stop sign              | potato/carbohydrate               |                          |
| 38 | handle       | pole           |                    |                  |                              | lettuce         | tomato                 | occupation/chef                   |                          |
| 39 | head         | roof           |                    |                  |                              | limb            | toothbrush             | spice/chili                       |                          |
| 40 | hooves       | seeds          |                    |                  |                              | livestock       | tree                   | religion/church                   |                          |
| 41 | horns        | shadow         |                    |                  |                              | male            | umbrella               | skyscrapers/city                  |                          |
| 42 | humps        | shirt          |                    |                  |                              | mammal          | waterfall              | roof/dome                         |                          |
| 43 | knuckles     | shoes          |                    |                  |                              | man             | zebra                  | house/dwelling                    |                          |
| 44 | leafy        | shoulder       |                    |                  |                              | monkey          | frog/amphibian         | hearing/ear                       |                          |
| 45 | leaves       | skin           |                    |                  |                              | natural         | potato/carbohydrate    | food/edible                       |                          |
| 46 | lips         | sky            |                    |                  |                              | object          | occupation/chef        | tool/equipment                    |                          |
| 47 | long         | snout          |                    |                  |                              | pear            | spice/chili            | woman/female                      |                          |
| 48 | metallic     | soil           |                    |                  |                              | pepper          | religion/church        | weapon/gun                        |                          |
| 49 | moustache    | stem           |                    |                  |                              | pinecone        | skyscrapers/city       | pliers/implement                  |                          |
| 50 | nail         | step           |                    |                  |                              | pineapple       | roof/dome              | water/lake                        |                          |
| 51 | neck         | stripes        |                    |                  |                              | primate         | house/dwelling         | maple leaf/leaf                   |                          |
| 52 | necklace     | stubble        |                    |                  |                              | radish          | hearing/ear            | organism/living                   |                          |
| 53 | nostrils     | sunglasses     |                    |                  |                              | red pepper      | woman/female           | wood/logs                         |                          |
| 54 | overalls     | tail           |                    |                  |                              | reptile         | wolf/fox               | sign/road sign                    |                          |
| 55 | palm         | tape           |                    |                  |                              | road            | weapon/gun             | adult/human/person                |                          |
| 56 | pear-shaped  | teeth          |                    |                  |                              | roundabout sign | wig/hair               | apple/apple core/eaten            |                          |
| 57 | plants       | thumb          |                    |                  |                              | salad           | pliers/implement       | arch/archway/monument             |                          |
| 58 | plastic      | tongue         |                    |                  |                              | sense           | water/lake             | bird/fightless/ostrich            |                          |
| 59 | pole         | torso          |                    |                  |                              | sheep           | maple leaf/leaf        | bovine/cattle/cow                 |                          |
| 60 | rectangular  | tower          |                    |                  |                              | shelter         | wood/logs              | boy/child/young                   |                          |
| 61 | red          | tree           |                    |                  |                              | snake           | sign/road sign         | bulb/light/light bulb             |                          |
| 62 | roof         | trigger        |                    |                  |                              | stop sign       | apple/apple core/eaten | canine/dog/pet                    |                          |
| 63 | rounded      | waterfall      |                    |                  |                              | symbol          | arch/archway/monument  | cassette tape/music/recording     |                          |
| 64 | seeds        | window         |                    |                  |                              | technology      | bird/fightless/ostrich | communication/mobile phone/phone  |                          |
| 65 | shadow       | wrist          |                    |                  |                              | tomato          | bovine/cattle/cow      | country/flag/Japanese flag        |                          |
| 66 | shiny        | legs/body      |                    |                  |                              | toothbrush      | boy/child/young        | knitting/wool/yarn                |                          |
| 67 | shirt        | cloves/bulbous |                    |                  |                              | tree            | bulb/light/light bulb  | big cat/cat/feline/lion           |                          |
| 68 | shoes        | wall/door      |                    |                  |                              | umbrella        | canine/dog/pet         | chair/furniture/office chair/seat |                          |

|     |                              |                              |  |  |                                             |                                             |                                             |
|-----|------------------------------|------------------------------|--|--|---------------------------------------------|---------------------------------------------|---------------------------------------------|
| 69  | shoulder                     | forehead/eyebrow             |  |  | urban                                       | cassette tape/music/recording               | eye/organ/sight/vision                      |
| 70  | skin                         | hand/fingers                 |  |  | vegetable                                   | communication/mobile phone/phone            | bush/garden/plant/shrub/topiary             |
| 71  | sky                          | ground/grass                 |  |  | vertebrate                                  | country/flag/Japanese flag                  | appliance/cooker/cooking/kitchen/oven/stove |
| 72  | snout                        | trousers/hat                 |  |  | warning                                     | knitting/wool/yarn                          |                                             |
| 73  | soil                         | path/house                   |  |  | waterfall                                   | big cat/cat/feline/lion                     |                                             |
| 74  | spiky                        | pupil/iris                   |  |  | zebra                                       | chair/furniture/office chair/seat           |                                             |
| 75  | stem                         | whiskers/mane                |  |  | frog/amphibian                              | eye/organ/sight/vision                      |                                             |
| 76  | step                         | nose/mouth                   |  |  | structure/architecture                      | bush/garden/plant/shrub/topiary             |                                             |
| 77  | straight                     | socks/pink                   |  |  | potato/carbohydrate                         | appliance/cooker/cooking/kitchen/oven/stove |                                             |
| 78  | stripes                      | tusks/trunk                  |  |  | occupation/chef                             |                                             |                                             |
| 79  | stubble                      | wet/water                    |  |  | spice/chili                                 |                                             |                                             |
| 80  | stubbly                      | antenna/buttons/screen       |  |  | religion/church                             |                                             |                                             |
| 81  | sunglasses                   | clouds/forest/lake           |  |  | skyscrapers/city                            |                                             |                                             |
| 82  | symmetrical                  | cubic/hob/square             |  |  | roof/dome                                   |                                             |                                             |
| 83  | tail                         | purple/seat/wheels           |  |  | house/dwelling                              |                                             |                                             |
| 84  | tape                         | spire/ steeple/tall          |  |  | hearing/ear                                 |                                             |                                             |
| 85  | teeth                        | beak/feathers/feathery/wings |  |  | food/edible                                 |                                             |                                             |
| 86  | thumb                        |                              |  |  | tool/equipment                              |                                             |                                             |
| 87  | tongue                       |                              |  |  | woman/female                                |                                             |                                             |
| 88  | torso                        |                              |  |  | wolf/fox                                    |                                             |                                             |
| 89  | lower                        |                              |  |  | weapon/gun                                  |                                             |                                             |
| 90  | tree                         |                              |  |  | wig/hair                                    |                                             |                                             |
| 91  | trigger                      |                              |  |  | pliers/implement                            |                                             |                                             |
| 92  | waterfall                    |                              |  |  | water/lake                                  |                                             |                                             |
| 93  | white                        |                              |  |  | maple leaf/leaf                             |                                             |                                             |
| 94  | window                       |                              |  |  | organism/living                             |                                             |                                             |
| 95  | wooden                       |                              |  |  | wood/logs                                   |                                             |                                             |
| 96  | woolly                       |                              |  |  | nonliving/manmade                           |                                             |                                             |
| 97  | wrist                        |                              |  |  | sign/road sign                              |                                             |                                             |
| 98  | yellow                       |                              |  |  | adult/human/person                          |                                             |                                             |
| 99  | legs/body                    |                              |  |  | apple/apple core/eaten                      |                                             |                                             |
| 100 | cloves/bulbous               |                              |  |  | arch/archway/monument                       |                                             |                                             |
| 101 | round/circular               |                              |  |  | bird/flightless/ostrich                     |                                             |                                             |
| 102 | wall/door                    |                              |  |  | bovine/cattle/cow                           |                                             |                                             |
| 103 | forehead/eyebrow             |                              |  |  | boy/child/young                             |                                             |                                             |
| 104 | hand/fingers                 |                              |  |  | bulb/light/light bulb                       |                                             |                                             |
| 105 | ground/grass                 |                              |  |  | canine/dog/pet                              |                                             |                                             |
| 106 | trousers/hat                 |                              |  |  | cassette tape/music/recording               |                                             |                                             |
| 107 | path/house                   |                              |  |  | communication/mobile phone/phone            |                                             |                                             |
| 108 | pupil/iris                   |                              |  |  | country/flag/Japanese flag                  |                                             |                                             |
| 109 | whiskers/mane                |                              |  |  | knitting/wool/yarn                          |                                             |                                             |
| 110 | nose/mouth                   |                              |  |  | big cat/cat/feline/lion                     |                                             |                                             |
| 111 | socks/pink                   |                              |  |  | chair/furniture/office chair/seat           |                                             |                                             |
| 112 | sharp/scaly                  |                              |  |  | eye/organ/sight/vision                      |                                             |                                             |
| 113 | tusks/trunk                  |                              |  |  | bush/garden/plant/shrub/topiary             |                                             |                                             |
| 114 | wet/water                    |                              |  |  | appliance/cooker/cooking/kitchen/oven/stove |                                             |                                             |
| 115 | antenna/buttons/screen       |                              |  |  |                                             |                                             |                                             |
| 116 | clouds/forest/lake           |                              |  |  |                                             |                                             |                                             |
| 117 | cubic/hob/square             |                              |  |  |                                             |                                             |                                             |
| 118 | purple/seat/wheels           |                              |  |  |                                             |                                             |                                             |
| 119 | spire/ steeple/tall          |                              |  |  |                                             |                                             |                                             |
| 120 | beak/feathers/feathery/wings |                              |  |  |                                             |                                             |                                             |
